# Supplementary material
Source: publisher site journal article supplement (https://www.dovepress.com/article/575986)
Supplement: Supplementary file 1 [file 575986%20Revised%20Supplementary%20Material.docx]

**Table S1.** **351 genes associated with sialylation retrieved from Genecards database**

| **Gene Symbol** | **GC Id** | **Relevance score** |
| --- | --- | --- |
| FUT7 | GC09M137030 | 17.65198326 |
| SELP | GC01M169558 | 17.0738678 |
| SELE | GC01M169722 | 14.36026192 |
| ST3GAL4 | GC11P126355 | 12.50442886 |
| FUT6 | GC19M005830 | 12.48497391 |
| FUT3 | GC19M104165 | 12.45635414 |
| FUT4 | GC11P104393 | 12.39587593 |
| SELPLG | GC12M108621 | 11.87776089 |
| ST3GAL6 | GC03P098732 | 11.73881912 |
| NEU1 | GC06M031857 | 11.66171169 |
| GNE | GC09M036214 | 10.56637764 |
| SELL | GC01M169690 | 10.36412239 |
| ST6GAL1 | GC03P186930 | 9.002573967 |
| MUC1 | GC01M155185 | 8.42552948 |
| ST6GALNAC1 | GC17M094317 | 8.334094048 |
| ST3GAL1 | GC08M133454 | 7.856826782 |
| SLC35A1 | GC06P087470 | 7.574083805 |
| FUT5 | GC19M005865 | 7.41577816 |
| ST8SIA4 | GC05M100806 | 6.745684624 |
| SLC35A2 | GC0XM048903 | 6.55622673 |
| NEU4 | GC02P242078 | 6.1848979 |
| GCNT1 | GC09P076504 | 6.008908749 |
| TMEM165 | GC04P055395 | 5.859881878 |
| ST6GALNAC6 | GC09M131254 | 5.817185402 |
| ST3GAL3 | GC01P043705 | 5.734291553 |
| ST8SIA3 | GC18P057350 | 5.715121269 |
| NEU2 | GC02P233032 | 5.550958633 |
| POMGNT2 | GC03M043121 | 5.470719337 |
| PLEKHM1 | GC17M093562 | 5.453691483 |
| FUT9 | GC06P096015 | 5.429000378 |
| CHST1 | GC11M045647 | 5.214091301 |
| C1GALT1C1 | GC0XM120625 | 5.18727684 |
| B4GALT1 | GC09M033100 | 5.02628231 |
| B3GALT5 | GC21P039556 | 4.975883007 |
| NEU3 | GC11P103760 | 4.917843819 |
| B4GALNT2 | GC17P144722 | 4.896590233 |
| DPM3 | GC01M155139 | 4.888047218 |
| MAN1B1 | GC09P137086 | 4.881631374 |
| SIGLEC8 | GC19M051450 | 4.785595417 |
| SLC35C1 | GC11P048644 | 4.753277779 |
| SIGLEC1 | GC20M003686 | 4.708815575 |
| ST3GAL2 | GC16M070375 | 4.690661907 |
| ALG1 | GC16P005033 | 4.532412529 |
| ALG6 | GC01P063367 | 4.532412529 |
| DOLK | GC09M128945 | 4.532412529 |
| COG8 | GC16M069320 | 4.521410465 |
| COG1 | GC17P073193 | 4.518251419 |
| MGAT3 | GC22P086945 | 4.468597889 |
| PGM1 | GC01P063593 | 4.430529594 |
| FUT1 | GC19M048748 | 4.377085686 |
| DPM1 | GC20M050934 | 4.362075806 |
| ALG12 | GC22M049859 | 4.362075806 |
| CEACAM5 | GC19P143025 | 4.337996483 |
| COG6 | GC13P039655 | 4.245927334 |
| CHST2 | GC03P143119 | 4.214517593 |
| SPN | GC16P029662 | 4.213160992 |
| ITGB2 | GC21M044885 | 4.207537174 |
| MPI | GC15P074890 | 4.160025597 |
| ALG8 | GC11M136954 | 4.160025597 |
| ALG3 | GC03M184244 | 4.160025597 |
| SRD5A3 | GC04P055346 | 4.160025597 |
| ALG13 | GC0XP111665 | 4.160025597 |
| COG5 | GC07M107201 | 4.052884102 |
| COG7 | GC16M023388 | 4.052884102 |
| CDH1 | GC16P068737 | 3.81491065 |
| ST6GALNAC3 | GC01P076074 | 3.807908297 |
| MUC2 | GC11P001074 | 3.805724859 |
| COG4 | GC16M074198 | 3.800086498 |
| CHST4 | GC16P114188 | 3.719008446 |
| MGAT2 | GC14P049620 | 3.674206257 |
| ST3GAL5 | GC02M085880 | 3.638798714 |
| LGALS8 | GC01P236518 | 3.634653807 |
| EGFR | GC07P055019 | 3.497365952 |
| PMM2 | GC16P008788 | 3.481870174 |
| ITGB1 | GC10M036806 | 3.431519032 |
| B3GNT3 | GC19P017794 | 3.278105736 |
| ITGAM | GC16P113208 | 3.263040781 |
| STT3A | GC11P125592 | 3.261004925 |
| DDOST | GC01M020651 | 3.261004925 |
| MOGS | GC02M074461 | 3.261004925 |
| STT3B | GC03P031532 | 3.261004925 |
| TCN2 | GC22P086685 | 3.261004925 |
| SLC46A1 | GC17M092927 | 3.261004925 |
| DHDDS | GC01P026432 | 3.261004925 |
| MPDU1 | GC17P007583 | 3.261004925 |
| SLC37A4 | GC11M137443 | 3.261004925 |
| SSR4 | GC0XP153793 | 3.261004925 |
| TUSC3 | GC08P015417 | 3.261004925 |
| ALG11 | GC13P052012 | 3.261004925 |
| ALG9 | GC11M137313 | 3.261004925 |
| GMPPA | GC02P219498 | 3.261004925 |
| RFT1 | GC03M054672 | 3.261004925 |
| MAG | GC19P035292 | 3.229329586 |
| TF | GC03P142020 | 3.205416203 |
| MUC5AC | GC11P015759 | 3.191776752 |
| ICAM1 | GC19P142230 | 3.190226078 |
| LGALS1 | GC22P037675 | 3.171303272 |
| ST6GALNAC2 | GC17M076565 | 3.167795897 |
| CHST3 | GC10P071964 | 3.102273703 |
| NME1 | GC17P144771 | 3.091150522 |
| PAEP | GC09P135561 | 3.087498188 |
| ADIPOQ | GC03P186842 | 3.085431337 |
| ST6GALNAC5 | GC01P076867 | 3.064901114 |
| APOE | GC19P143132 | 3.061268091 |
| ITGA4 | GC02P181492 | 3.041239262 |
| PODXL2 | GC03P127629 | 3.013386965 |
| ST8SIA6 | GC10M017315 | 2.99030757 |
| SIGLEC15 | GC18P045825 | 2.942390442 |
| ITGAL | GC16P030472 | 2.901477814 |
| ST8SIA2 | GC15P092393 | 2.900394678 |
| CMAS | GC12P022046 | 2.865514755 |
| GBA3 | GC04P028495 | 2.831070662 |
| CACNA1C | GC12P001970 | 2.76087141 |
| MUC4 | GC03M195746 | 2.699096203 |
| MUC6 | GC11M001012 | 2.699096203 |
| B4GALT4 | GC03M119211 | 2.69833231 |
| EPO | GC07P100720 | 2.689536333 |
| SIGLEC7 | GC19P051142 | 2.668291569 |
| CD59 | GC11M033733 | 2.577344179 |
| ST6GAL2 | GC02M106801 | 2.558844566 |
| VCAM1 | GC01P100719 | 2.533433437 |
| LGALS3 | GC14P055124 | 2.530962467 |
| MAN2A1 | GC05P109689 | 2.512116194 |
| MUC7 | GC04P070430 | 2.434412956 |
| GALNT3 | GC02M165747 | 2.416198492 |
| FUCA1 | GC01M023845 | 2.396097422 |
| ST6GALNAC4 | GC09M127907 | 2.38991785 |
| COLEC12 | GC18M000318 | 2.361622334 |
| C20orf173 | GC20M036703 | 2.356523037 |
| CD22 | GC19P035319 | 2.297525644 |
| B3GNT5 | GC03P183253 | 2.290379763 |
| PTGDS | GC09P150224 | 2.273483992 |
| VWF | GC12M034378 | 2.266891479 |
| HP | GC16P114216 | 2.260865211 |
| SLC26A2 | GC05P157260 | 2.255989075 |
| GMDS | GC06M001624 | 2.225754976 |
| ALG2 | GC09M099216 | 2.222028732 |
| CP | GC03M149162 | 2.211625338 |
| PECAM1 | GC17M064319 | 2.211625338 |
| MGAT5 | GC02P134119 | 2.203922272 |
| CD79A | GC19P041877 | 2.199562788 |
| PIGV | GC01P026787 | 2.193759918 |
| PIGM | GC01M166491 | 2.193759918 |
| TNF | GC06P173080 | 2.156491518 |
| UAP1 | GC01P162561 | 2.134400368 |
| PDPN | GC01P013583 | 2.129942179 |
| CD40LG | GC0XP136649 | 2.111368179 |
| IL1B | GC02M112829 | 2.111368179 |
| MADCAM1 | GC19P141772 | 2.111368179 |
| TLR4 | GC09P117704 | 2.110716105 |
| SLC35D1 | GC01M066999 | 2.086355686 |
| FUT2 | GC19P048695 | 2.07839036 |
| CCR5 | GC03P063059 | 2.054858208 |
| TNR | GC01M175291 | 2.054858208 |
| NANS | GC09P098056 | 2.049573898 |
| LPA | GC06M160531 | 2.039689302 |
| SIGLEC6 | GC19M051517 | 2.038813591 |
| GATA3 | GC10P008045 | 2.035123825 |
| CFH | GC01P196621 | 2.019453764 |
| PMEL | GC12M055954 | 2.005219936 |
| KLRD1 | GC12P010226 | 1.99193573 |
| NCAM1 | GC11P112961 | 1.987823486 |
| PLG | GC06P160702 | 1.979884386 |
| CEACAM1 | GC19M042507 | 1.978917003 |
| SLC2A6 | GC09M133471 | 1.975470185 |
| CGB5 | GC19P049043 | 1.975470185 |
| COG2 | GC01P230642 | 1.946449995 |
| VTN | GC17M092926 | 1.928332686 |
| SLC35A4 | GC05P156977 | 1.922125578 |
| FUT8 | GC14P065356 | 1.905139923 |
| CTSD | GC11M001752 | 1.847663879 |
| SIGLEC5 | GC19M105394 | 1.841590405 |
| DMBT1 | GC10P122560 | 1.827933669 |
| KRT19 | GC17M041523 | 1.820782185 |
| B3GLCT | GC13P031225 | 1.818558097 |
| CD36 | GC07P080369 | 1.807451844 |
| PRG4 | GC01P186296 | 1.788941622 |
| ATP6V0A2 | GC12P123712 | 1.765950203 |
| ACE | GC17P063477 | 1.746813416 |
| B3GNT2 | GC02P062196 | 1.746813416 |
| BDNF-AS | GC11P027466 | 1.731523752 |
| TGFB1 | GC19M041301 | 1.713367105 |
| OSM | GC22M030262 | 1.700127363 |
| ACP3 | GC03P142003 | 1.691639423 |
| GFUS | GC08M147150 | 1.683132887 |
| GAL | GC11P103539 | 1.669476151 |
| TNFRSF1A | GC12M006328 | 1.635125875 |
| CLEC4C | GC12M034472 | 1.61861515 |
| MAN2A2 | GC15P090902 | 1.612933636 |
| CHST6 | GC16M075472 | 1.595225215 |
| IL6 | GC07P022725 | 1.591778398 |
| SERPINA1 | GC14M094376 | 1.591778398 |
| LCAT | GC16M067939 | 1.578451514 |
| TBCK | GC04M106041 | 1.571086526 |
| ST8SIA1 | GC12M022063 | 1.569409847 |
| GYPE | GC04M143870 | 1.56874609 |
| BACE1 | GC11M117285 | 1.544640899 |
| PLCB4 | GC20P009067 | 1.539900303 |
| MLXIPL | GC07M073593 | 1.539900303 |
| PIGY | GC04M088520 | 1.528880954 |
| MGAT1 | GC05M183127 | 1.521448135 |
| SLC35C2 | GC20M046345 | 1.521448135 |
| ERBB2 | GC17P039687 | 1.519297123 |
| CXCL8 | GC04P073740 | 1.519297123 |
| CERNA3 | GC08P056411 | 1.519297123 |
| CD46 | GC01P207752 | 1.509248972 |
| SP1 | GC12P053380 | 1.509248972 |
| PDIA3 | GC15P043746 | 1.509248972 |
| CCR9 | GC03P063047 | 1.509248972 |
| GCNT3 | GC15P059594 | 1.509248972 |
| CD44 | GC11P035139 | 1.505352259 |
| CREBBP | GC16M046544 | 1.475917816 |
| MUC17 | GC07P101020 | 1.475917816 |
| IGHA1 | GC14M123370 | 1.458693027 |
| SCG2 | GC02M223596 | 1.456758142 |
| SLC35B2 | GC06M044254 | 1.456758142 |
| EP300 | GC22P087011 | 1.439049721 |
| HDAC3 | GC05M141620 | 1.439049721 |
| HDAC5 | GC17M044076 | 1.439049721 |
| TBX21 | GC17P047733 | 1.439049721 |
| FCGR1A | GC01P173134 | 1.439049721 |
| B3GNT6 | GC11P077034 | 1.439049721 |
| CD209 | GC19M007739 | 1.423760176 |
| RTN4R | GC22M020241 | 1.397749662 |
| SLC17A5 | GC06M073593 | 1.397749662 |
| MMP2 | GC16P113682 | 1.39720273 |
| CCR7 | GC17M093375 | 1.386934996 |
| TLR2 | GC04P153684 | 1.363121629 |
| SFTPA2 | GC10M084335 | 1.363121629 |
| PTPRC | GC01P198607 | 1.347872019 |
| CD14 | GC05M140631 | 1.34756434 |
| MFAP4 | GC17M019383 | 1.34756434 |
| MUC5B | GC11P015762 | 1.32736218 |
| SERPINA5 | GC14P094850 | 1.307947636 |
| B4GALNT1 | GC12M057623 | 1.306378603 |
| GCNT2 | GC06P010492 | 1.306105733 |
| COL3A1 | GC02P188974 | 1.300582647 |
| ADSL | GC22P040346 | 1.300582647 |
| PDP1 | GC08P093857 | 1.300582647 |
| HMGCL | GC01M023801 | 1.300582647 |
| POMT1 | GC09P131502 | 1.300582647 |
| POFUT1 | GC20P032207 | 1.300582647 |
| KCNC4 | GC01P111557 | 1.300582647 |
| POMT2 | GC14M077274 | 1.300582647 |
| FERMT3 | GC11P103208 | 1.300582647 |
| MLYCD | GC16P083899 | 1.300582647 |
| PGM3 | GC06M103994 | 1.300582647 |
| TACR2 | GC10M069403 | 1.300582647 |
| PDP2 | GC16P113936 | 1.300582647 |
| NMB | GC15M084655 | 1.300582647 |
| APBB1IP | GC10P026448 | 1.300582647 |
| KRT3 | GC12M052789 | 1.300582647 |
| RAPGEF5 | GC07M022128 | 1.300582647 |
| CALCB | GC11P014904 | 1.300582647 |
| POFUT2 | GC21M045263 | 1.300582647 |
| FCSK | GC16P070454 | 1.300582647 |
| PLA2G4E | GC15M041981 | 1.300582647 |
| SLC35B1 | GC17M049700 | 1.300582647 |
| FAHD2A | GC02P098937 | 1.300582647 |
| CCDC85C | GC14M099500 | 1.300582647 |
| SLC35B4 | GC07M134290 | 1.300582647 |
| SLC35D3 | GC06P136922 | 1.300582647 |
| DENND1C | GC19M006467 | 1.300582647 |
| FUOM | GC10M133557 | 1.300582647 |
| SLC35E3 | GC12P068746 | 1.300582647 |
| SLC35D2 | GC09M096313 | 1.300582647 |
| C6orf89 | GC06P173211 | 1.300582647 |
| MIR3187 | GC19P000813 | 1.300582647 |
| MIR4492 | GC11P118910 | 1.300582647 |
| MIR1268B | GC17P080098 | 1.300582647 |
| ITGA3 | GC17P050055 | 1.284014702 |
| LTF | GC03M046435 | 1.284014702 |
| ASGR2 | GC17M007101 | 1.284014702 |
| B4GAT1 | GC11M066345 | 1.284014702 |
| HEG1 | GC03M124965 | 1.284014702 |
| PRNP | GC20P004686 | 1.282874346 |
| ATF2 | GC02M175072 | 1.282874346 |
| CD80 | GC03M119524 | 1.282874346 |
| CCL3 | GC17M036088 | 1.282874346 |
| CSF3 | GC17P040015 | 1.282874346 |
| KLRC1 | GC12M034550 | 1.282874346 |
| PTAFR | GC01M028147 | 1.282874346 |
| SLC2A1 | GC01M042925 | 1.271636248 |
| RAC1 | GC07P017475 | 1.271636248 |
| BDKRB2 | GC14P096205 | 1.271636248 |
| C1GALT1 | GC07P007156 | 1.260982513 |
| F8 | GC0XM154835 | 1.236877203 |
| ITGA2 | GC05P052989 | 1.236877203 |
| UMOD | GC16M047825 | 1.236877203 |
| CAT | GC11P034460 | 1.211533546 |
| CLU | GC08M027596 | 1.211533546 |
| LINC02605 | GC08P078838 | 1.211533546 |
| APP | GC21M025880 | 1.18473804 |
| PTK2 | GC08M140657 | 1.18473804 |
| TSHR | GC14P080954 | 1.18473804 |
| MIR146B | GC10P102436 | 1.156208515 |
| ENO2 | GC12P006913 | 1.133100033 |
| CLEC12A | GC12P009951 | 1.126977205 |
| F2 | GC11P048666 | 1.125557303 |
| MBL2 | GC10M052760 | 1.125557303 |
| SCN4A | GC17M063938 | 1.125557303 |
| AHSG | GC03P186696 | 1.125557303 |
| FUT11 | GC10P073772 | 1.125557303 |
| GAL3ST2 | GC02P242081 | 1.125557303 |
| MIR26B | GC02P218402 | 1.125557303 |
| MIR26A1 | GC03P037969 | 1.125557303 |
| ATP6AP1 | GC0XP154428 | 1.119886398 |
| FN1 | GC02M215360 | 1.116219521 |
| KLRK1 | GC12M034546 | 1.105720758 |
| FAS | GC10P120086 | 1.092226028 |
| CTCF | GC16P114003 | 1.092226028 |
| APOH | GC17M066212 | 1.092226028 |
| CD9 | GC12P068233 | 1.092226028 |
| PI4K2A | GC10P097640 | 1.092226028 |
| CHGA | GC14P094540 | 1.092226028 |
| GYPA | GC04M144109 | 1.092226028 |
| FCAR | GC19P143555 | 1.092226028 |
| GOLPH3 | GC05M032124 | 1.092226028 |
| CLEC4A | GC12P068319 | 1.092226028 |
| SIGLEC9 | GC19P143376 | 1.092226028 |
| FGFR1 | GC08M038400 | 1.055358052 |
| KDR | GC04M055078 | 1.055358052 |
| NRP1 | GC10M033177 | 1.055358052 |
| PROM1 | GC04M015965 | 1.055358052 |
| ICAM2 | GC17M064002 | 1.055358052 |
| PTX3 | GC03P157436 | 1.055358052 |
| RNASE3 | GC14P020891 | 1.055358052 |
| LGALS9 | GC17P027629 | 1.055358052 |
| PILRA | GC07P100367 | 1.055358052 |
| MUC3A | GC07P100949 | 1.055358052 |
| HOTAIR | GC12M053962 | 1.055358052 |
| MIR214 | GC01M172234 | 1.055358052 |
| MIR193B | GC16P112531 | 1.055358052 |
| HNF1A | GC12P120978 | 1.05077076 |
| CFHR1 | GC01P196822 | 1.05077076 |
| NPC2 | GC14M074476 | 1.049352646 |
| F11 | GC04P186424 | 1.045934558 |
| CD248 | GC11M066314 | 1.045934558 |
| AFM | GC04P073481 | 1.045934558 |
| AKT1 | GC14M104769 | 1.013792515 |
| ERBB3 | GC12P069869 | 1.013510942 |
| NOTCH1 | GC09M139117 | 1.013510942 |
| ACE2 | GC0XM015494 | 1.013510942 |
| FCGR2B | GC01P174147 | 1.013510942 |
| LRP1 | GC12P057128 | 1.013510942 |
| VCAN | GC05P083471 | 1.013510942 |
| CADM1 | GC11M115169 | 1.013510942 |
| GYPC | GC02P151295 | 1.013510942 |
| LYVE1 | GC11M014342 | 1.013510942 |
| MEG3 | GC14P120211 | 1.013510942 |
| F2RL1 | GC05P076818 | 1.004087448 |

**Table S2. Oligonucleotide sequences of the siRNAs used in the study.**

| Name | Sequence (5′-3′) |
| --- | --- |
| ST3GAL4-1 | Sense: 5′-GGAGAUUGCAGCUGACAAATT-3′ |
|  | Antisense: 5′-UUUGUCAGCUGCAAUCUCCTT-3′ |
| ST3GAL4-2 | Sense: 5′-GGGAAGACAGGUACAUCGATT-3′ |
|  | Antisense: 5′-UCGAUGUACCUGUCUUCCCTT-3′ |
| siRNA-NC | Sense: 5′-UUCUCCGAACGUGUCACGUTT-3′ |
|  | Antisense: 5′-ACGUGACACGUUCGGAGAATT-3′ |

siRNA, small interfering RNA; NC, negative control.

**Table S3. The primary antibodies used in this study**

| Antibody name | Vendor | Catalog number, | Dilution ratio |
| --- | --- | --- | --- |
| ST3GAL4 | Sabbiotech | #38813 | 1:1000 |
| β-Tubulin | Proteintech | No. 10094-1-AP | 1:3000 |

**Figure S1**

**A**
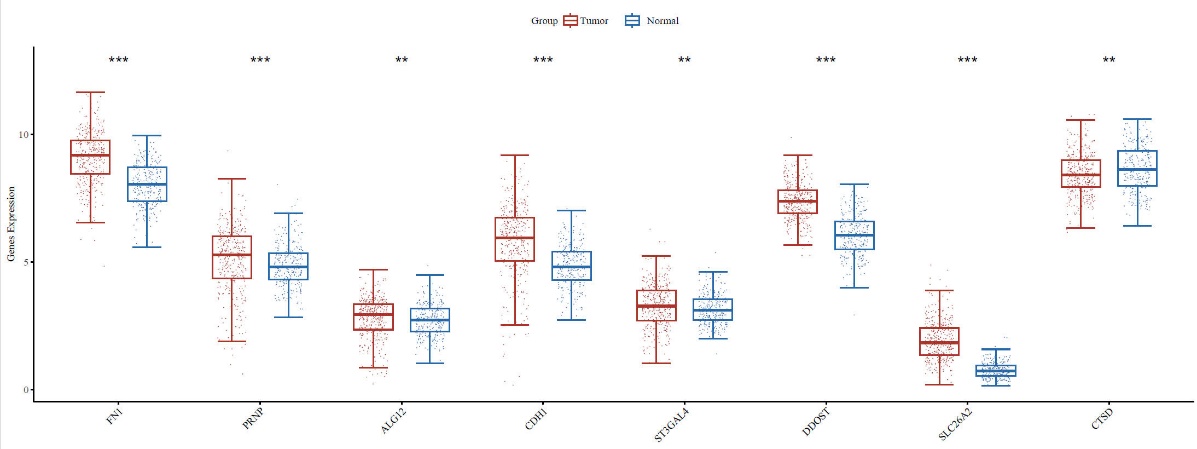


**B C**


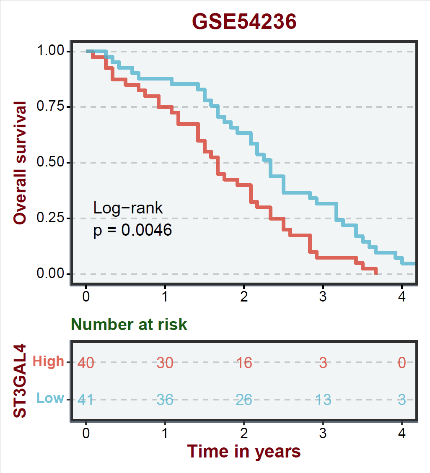

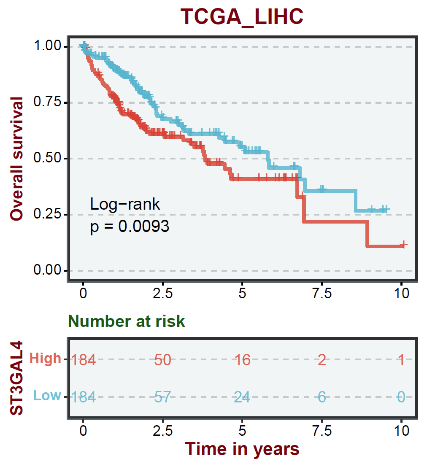


**Figure S1** (A) Expression levels of 8 sialylation prognostic model genes in HCC and normal controls. (B) Overall survival was determined on the basis of ST3GAL4 expression in patients with clinically diagnosed HCC using the GSE54236 database. (C）Overall survival was determined on the basis of ST3GAL4 expression in patients with clinically diagnosed HCC using the TCGA_LIHC database. **p* < 0.05, ***p* < 0.01, ****p* < 0.001.
